# Supplementary material for: Alternative rapamycin treatment regimens mitigate the impact of rapamycin on glucose homeostasis and the immune system
Source: PubMed Central journal article supplement (PMC4717280; doi:10.1111/acel.12405), 2015-10-13

Figure S1

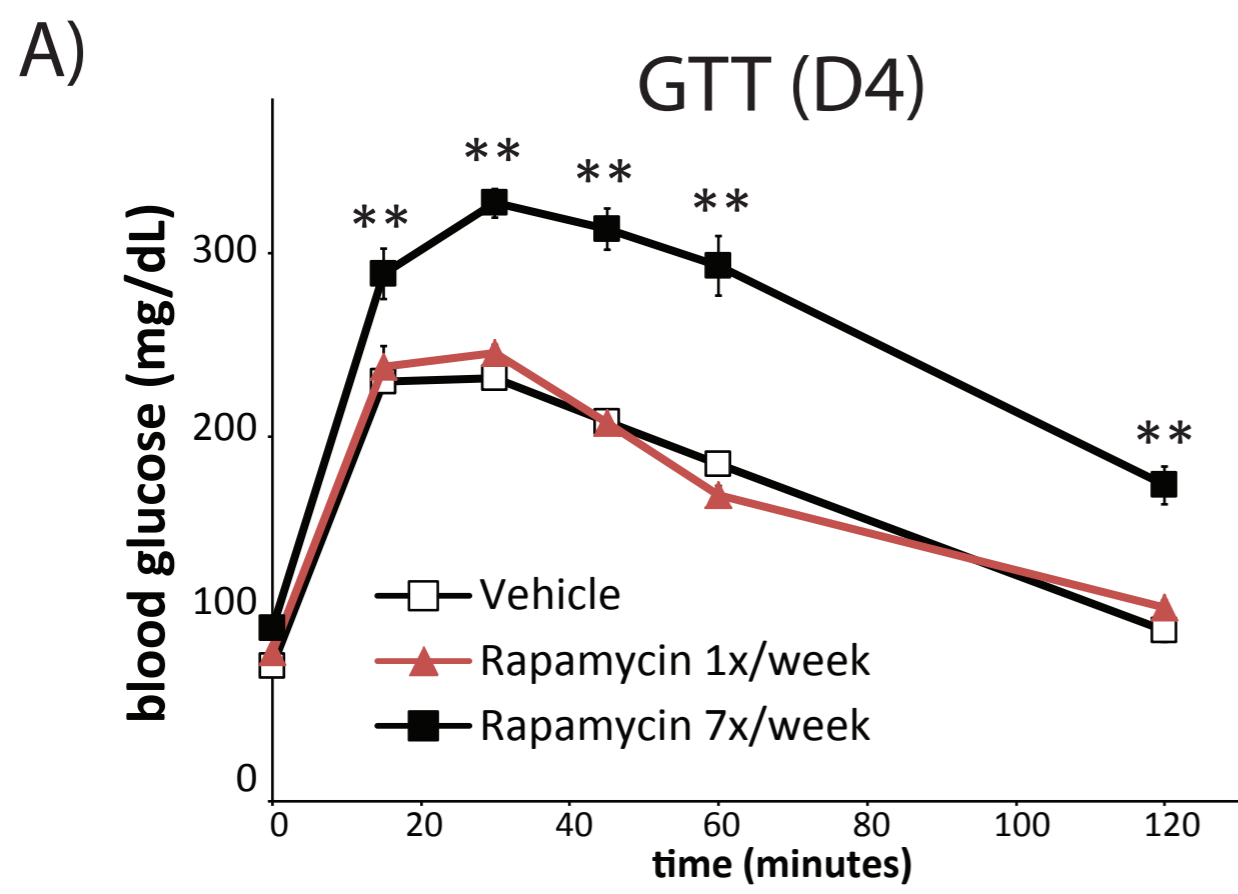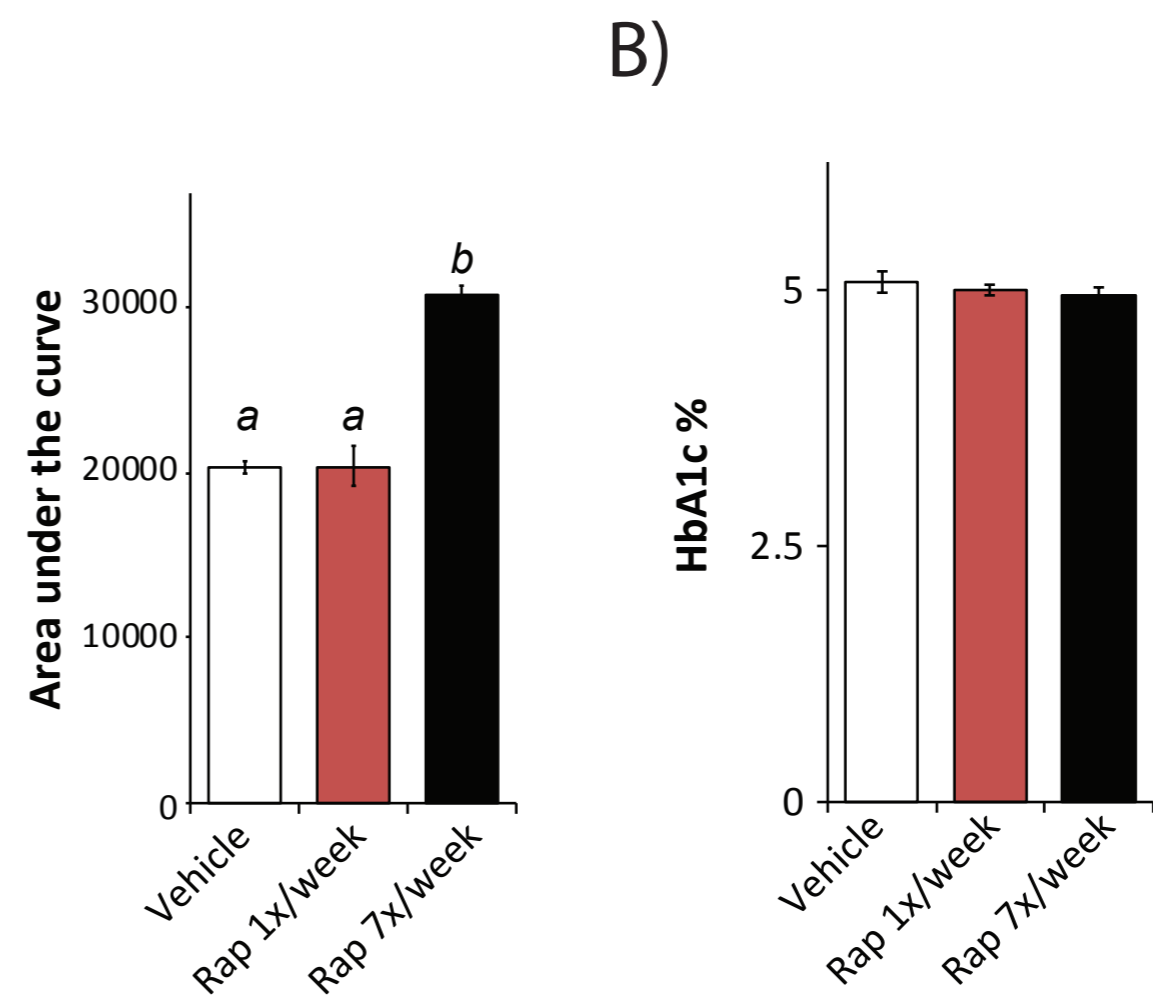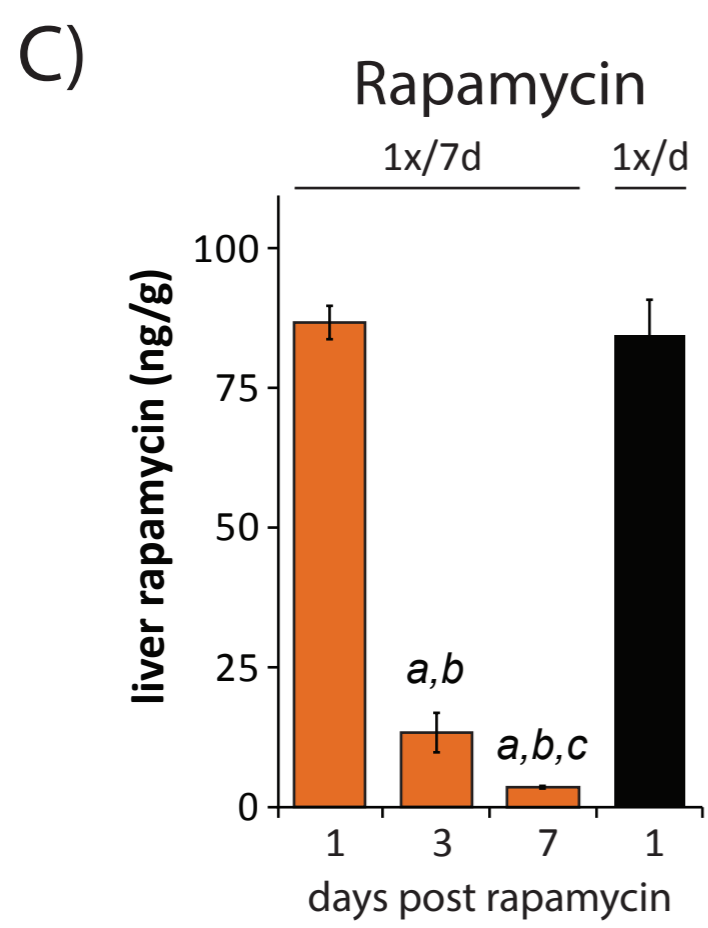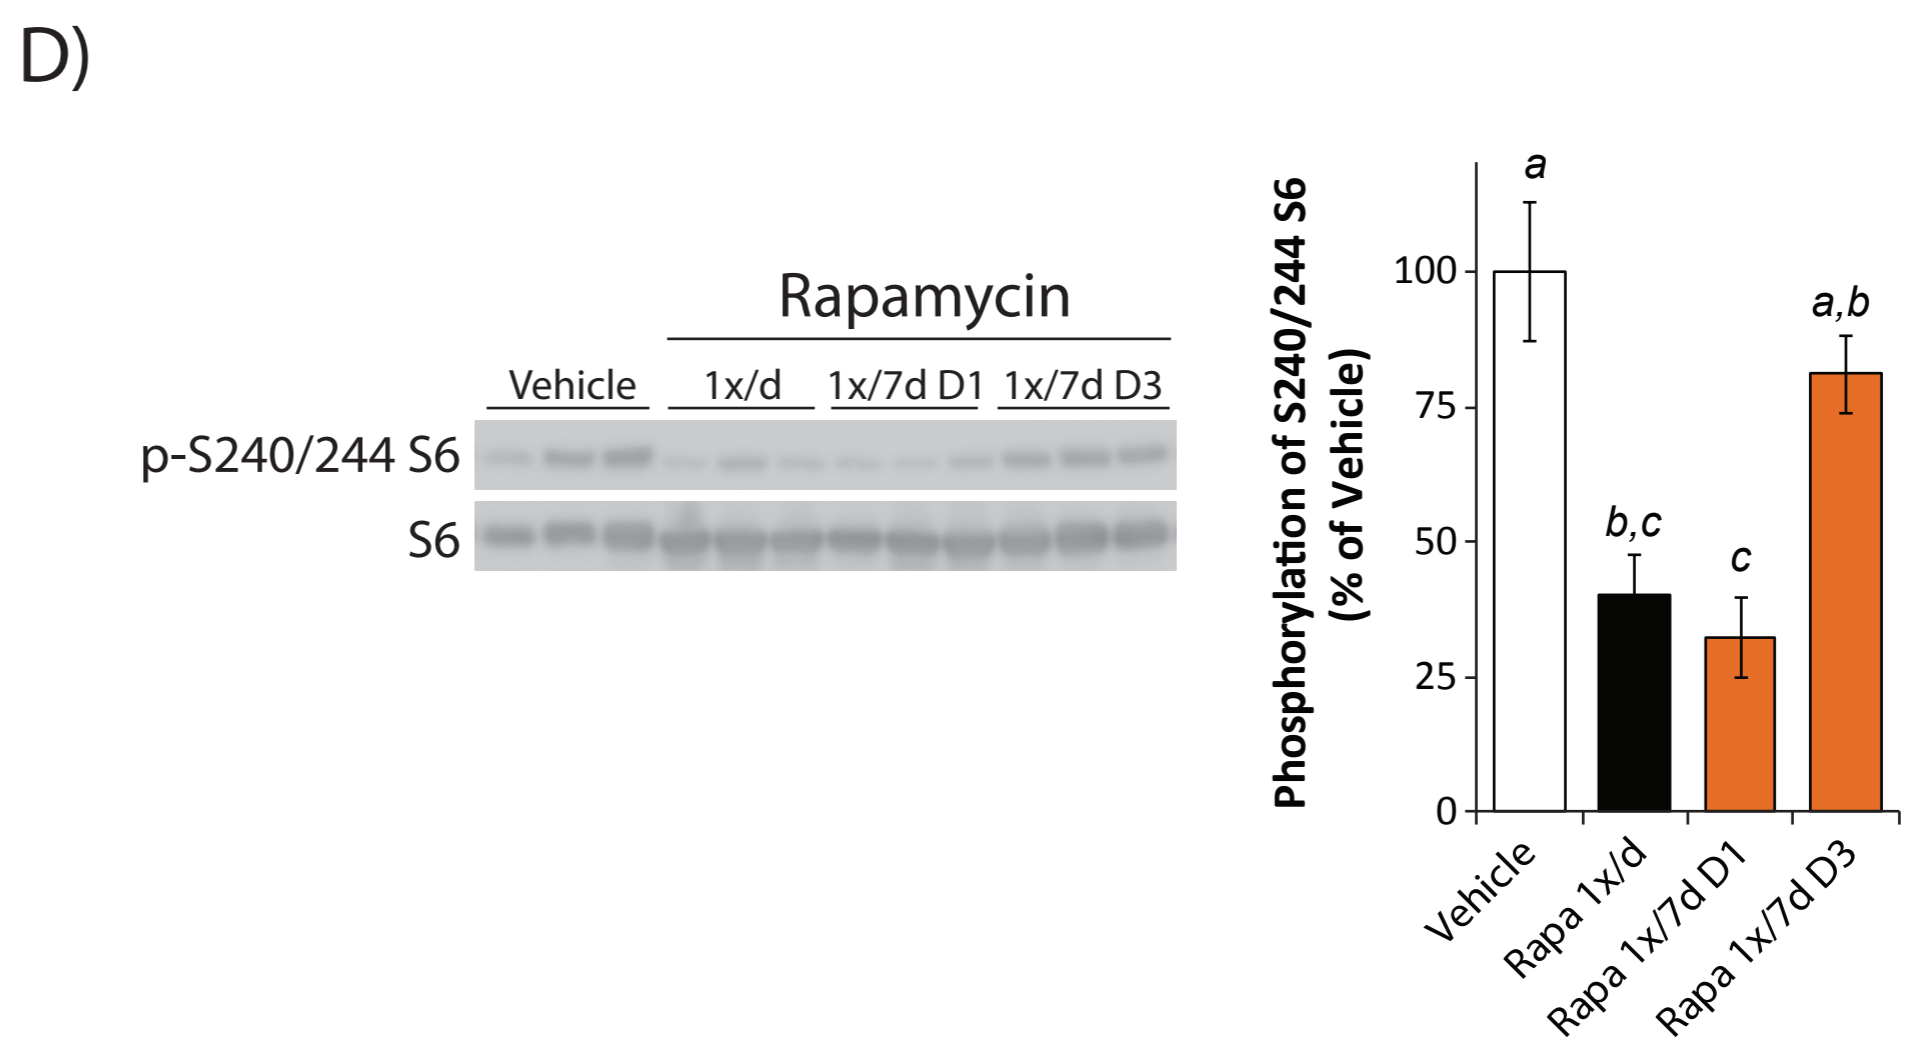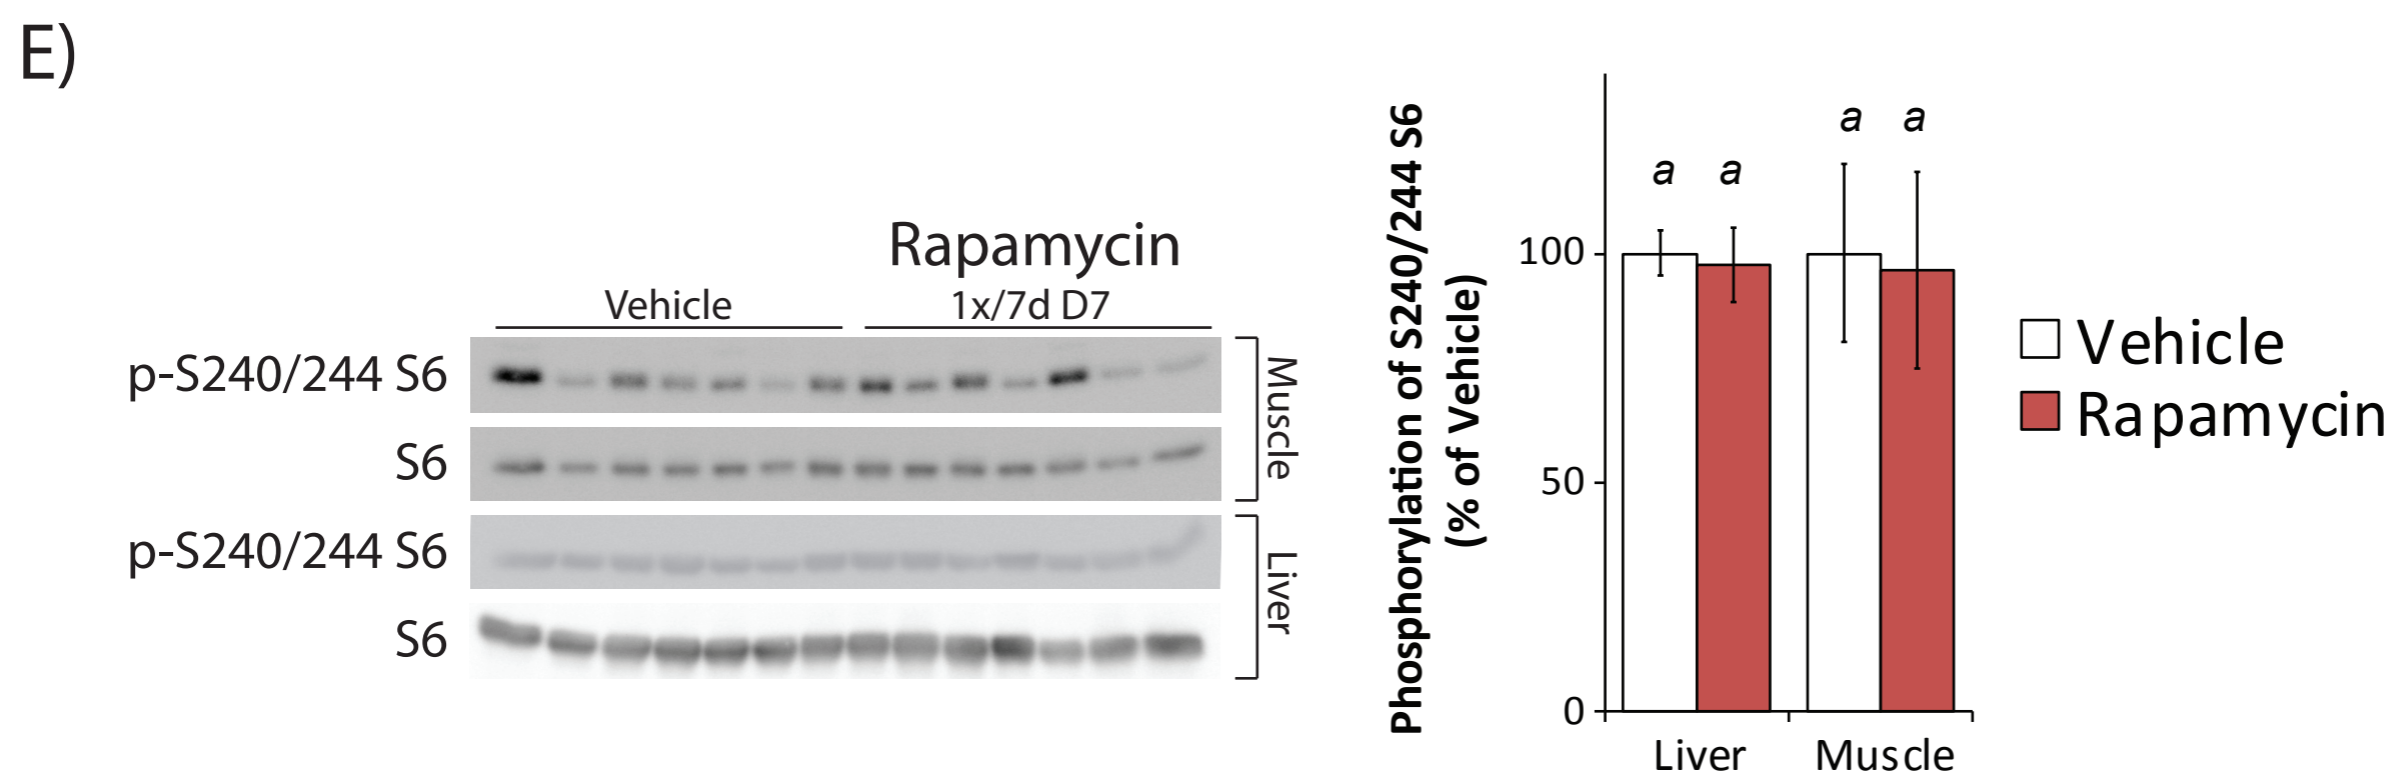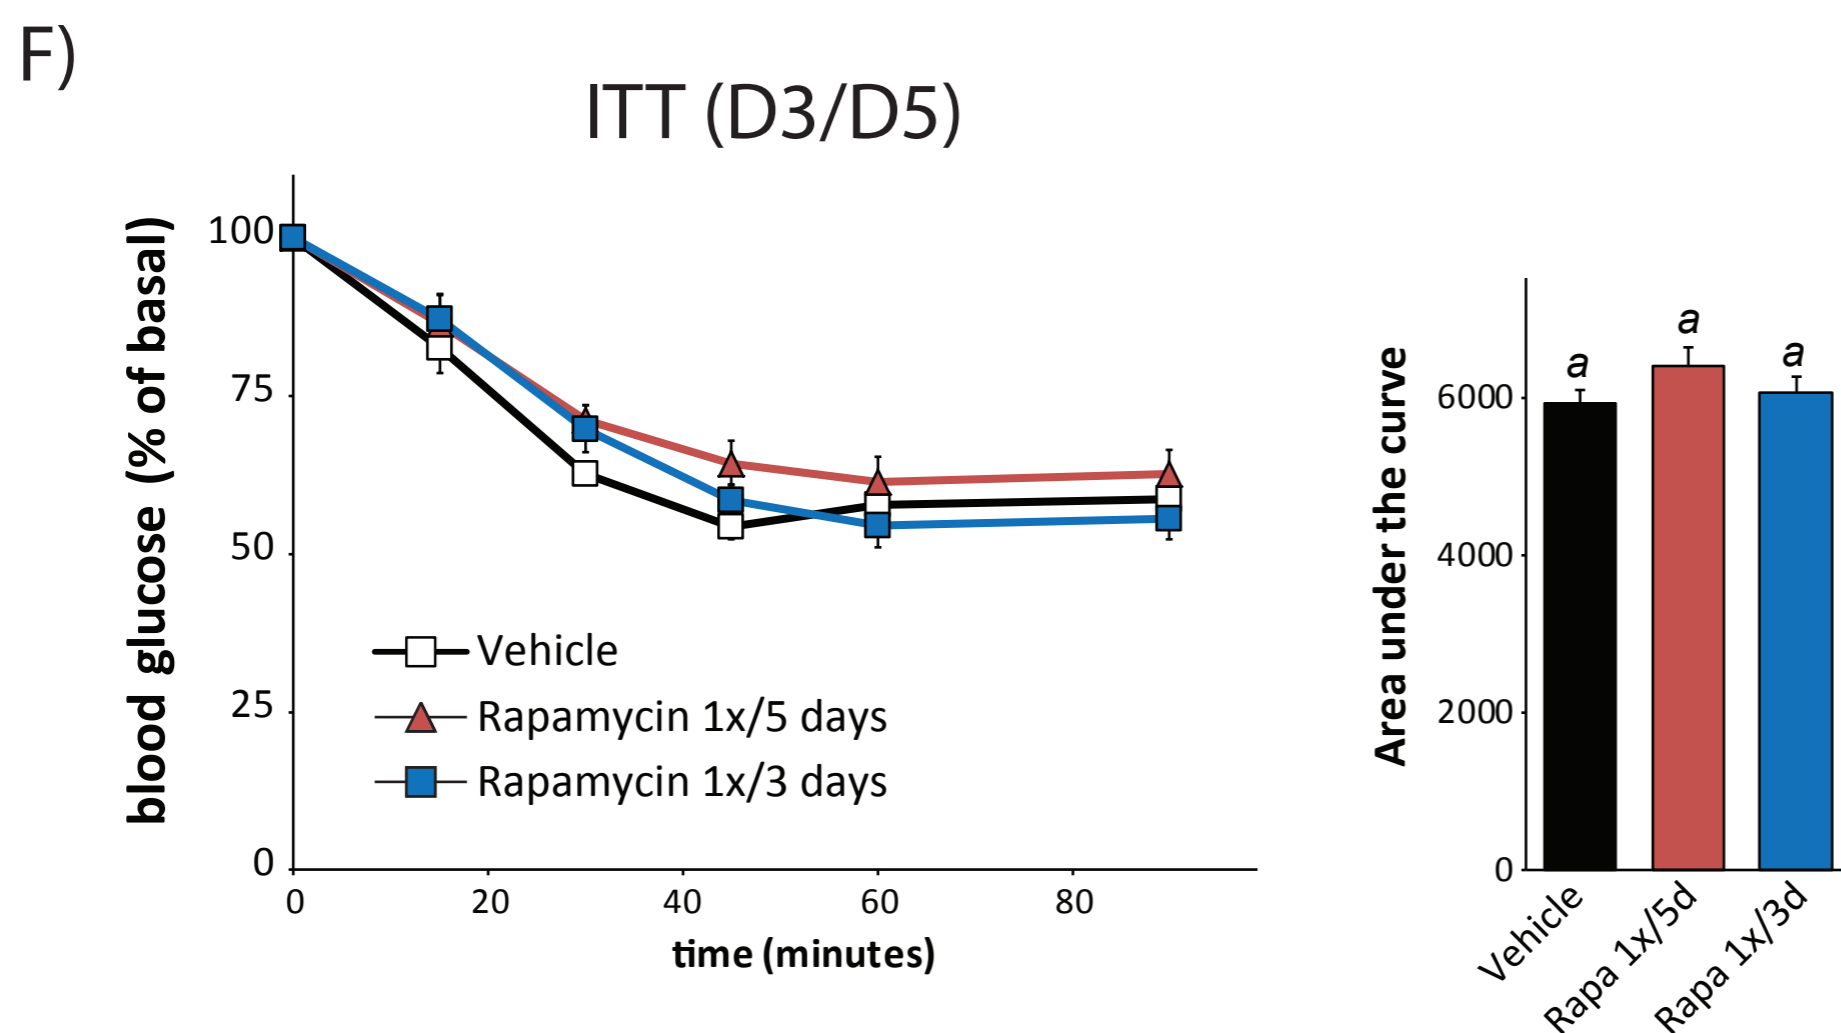

Supplement: ACEL-15-028-s001.pdf [file ACEL-15-028-s001.pdf]
